# Supplementary material for: Early Omicron infection is associated with increased reinfection risk in older adults in long-term care and retirement facilities
Source: PubMed Central journal article supplement — eClinicalMedicine. 2023 Aug 21;63:102148. doi: 10.1016/j.eclinm.2023.102148 (PMC10518514; doi:10.1016/j.eclinm.2023.102148), 2023-08-21
Supplement: mmc1.pdf [file mmc1.pdf]

## Supplementary Appendix

### Early Omicron infection is associated with increased reinfection risk in older adults in long-term care and retirement facilities

#### Table of Contents

#### *Supplementary Figures*

|                                                                                                                 |   |
|-----------------------------------------------------------------------------------------------------------------|---|
| <b>Figure S1.</b> Cox proportional hazards regression analysis – complete frailty dataset .....                 | 2 |
| <b>Figure S2.</b> Correlations of serum antibody measurements .....                                             | 3 |
| <b>Figure S3.</b> Paired analysis of serum antibody measurements in participants with Omicron reinfections..... | 4 |

#### *Supplementary Tables*

|                                                                                                                                                                               |    |
|-------------------------------------------------------------------------------------------------------------------------------------------------------------------------------|----|
| <b>Table S1.</b> Cohort comorbidities at baseline by observation period outcome .....                                                                                         | 5  |
| <b>Table S2.</b> List of immunosuppressive medications.....                                                                                                                   | 6  |
| <b>Table S3.</b> Summary of participants taking immunosuppressive medications .....                                                                                           | 7  |
| <b>Table S4.</b> Analysis of maximum likelihood estimates of risk of SARS-CoV-2 Omicron infection between July 1 and September 13, 2022 .....                                 | 8  |
| <b>Table S5.</b> Analysis of maximum likelihood estimates of risk of SARS-CoV-2 Omicron infection between July 1 and September 13, 2022 – complete frailty dataset.....       | 9  |
| <b>Table S6.</b> Immune analysis cohort demographics by early Omicron SARS-CoV-2 infection history.....                                                                       | 10 |
| <b>Table S7.</b> Immune analysis cohort comorbidities by early Omicron SARS-CoV-2 infection history and observation period outcome .....                                      | 11 |
| <b>Table S8.</b> Immune analysis cohort demographics by early Omicron SARS-CoV-2 infection history and observation period outcome .....                                       | 12 |
| <b>Table S9.</b> Humoral and cellular assessments by SARS-CoV-2 Omicron infection history before the observation period.....                                                  | 13 |
| <b>Table S10.</b> Humoral and cellular assessments in individuals with no prior SARS-CoV-2 Omicron infection by Omicron infection outcome during the observation period ..... | 14 |
| <b>Table S11.</b> Humoral and cellular assessments in individuals with prior Omicron infection by SARS-CoV-2 Omicron infection outcome during the observation period .....    | 15 |

**Figure S1.** Cox proportional hazards regression analysis – complete frailty dataset

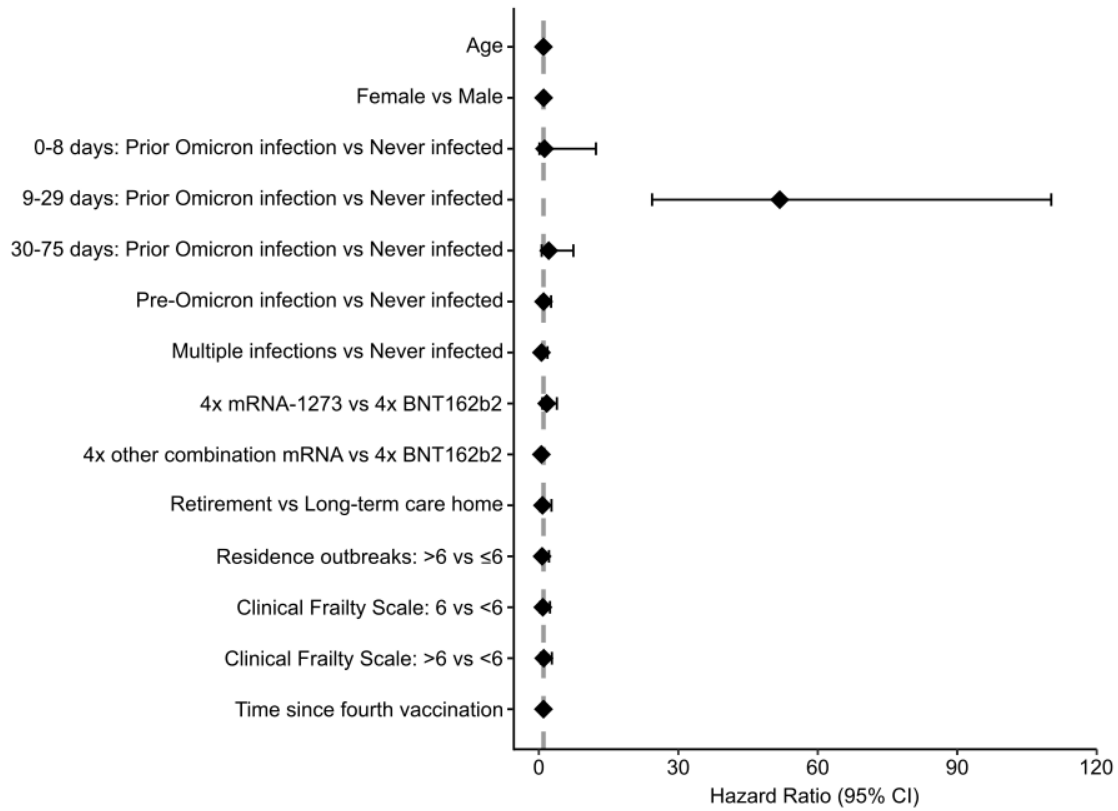

The Cox proportional-hazards regression model was used to estimate hazard ratios of Omicron infection between July 1 and September 13, 2022, with the baseline hazard on July 1, 2022. Variables (age, sex, previous infection, mRNA vaccine combination, residence type, number of outbreaks, clinical frailty scale, time since fourth vaccination) reflect characteristics at baseline, with adjustment for study site. The hazard ratios are presented with 95% confidence intervals based on robust standard errors.

**Figure S2.** Correlations of serum antibody measurements

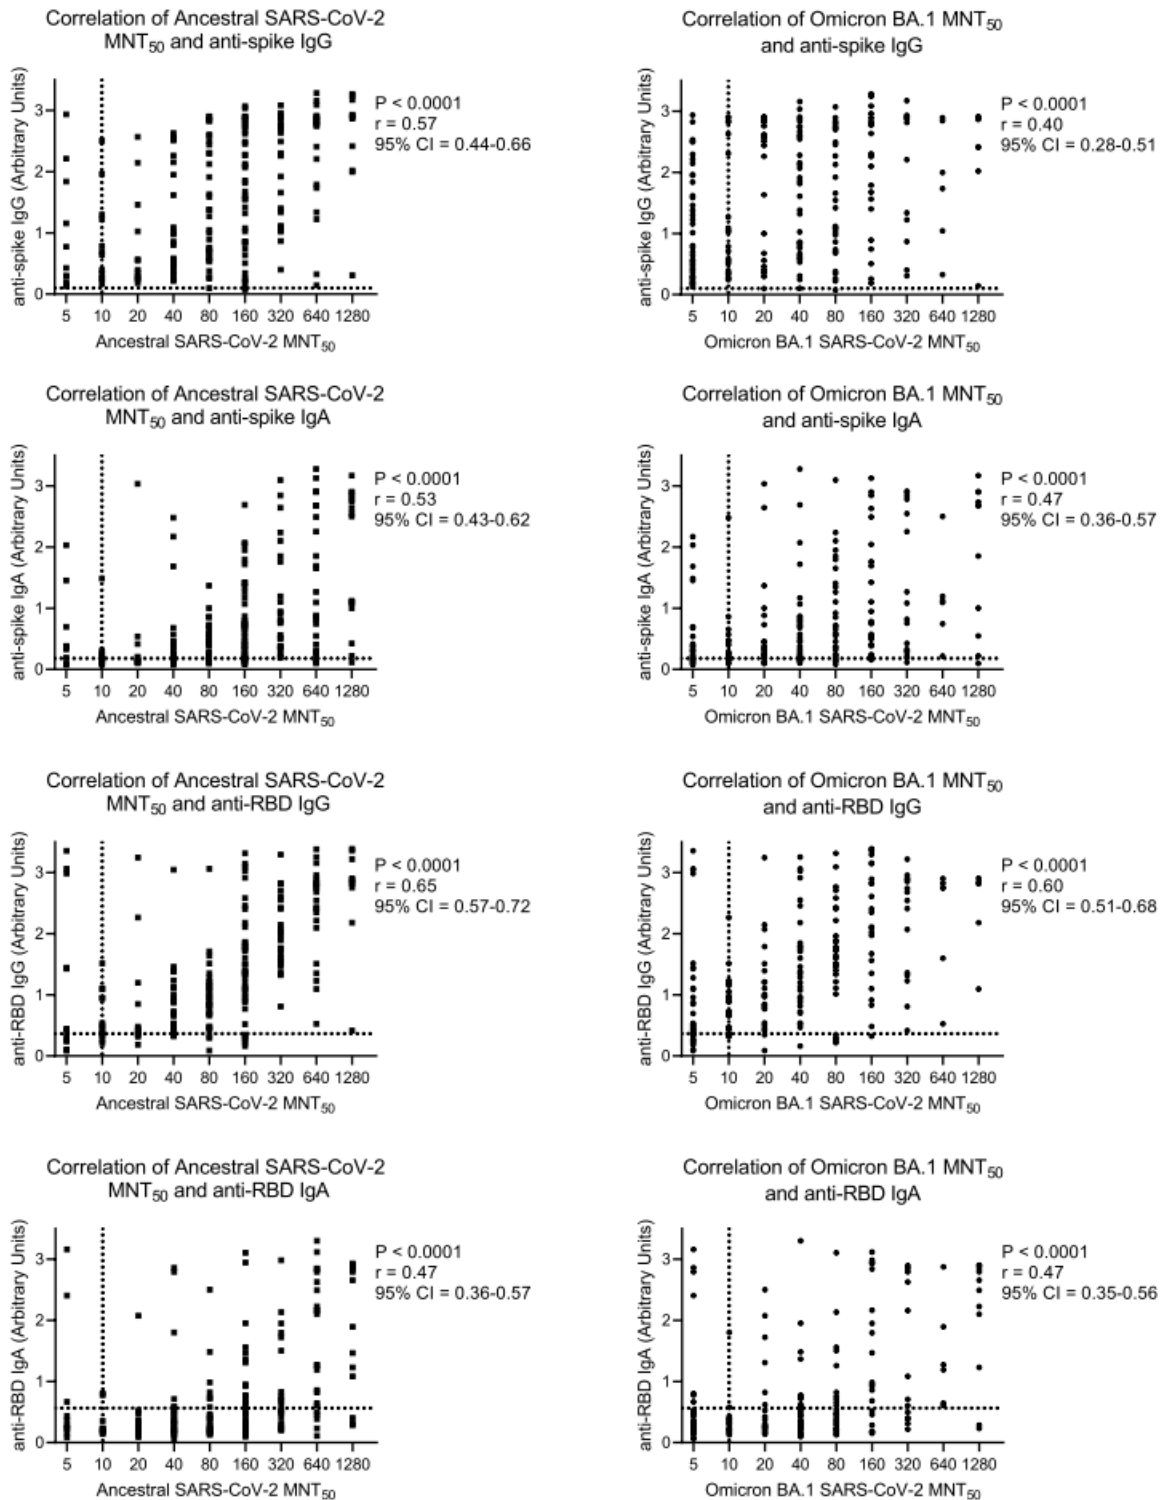

In serum samples collected within three months prior to the start of the observation period (i.e., collected between April 1 and June 30 before the July 1 to September 13, 2022 observation period), ancestral anti-spike and anti-RBD (receptor binding domain) IgG and IgA antibody levels were measured by ELISA, and microneutralization titres (MNT<sub>50</sub>) of ancestral and Omicron BA.1 anti-SARS-CoV-2 antibodies were assessed. Data for microneutralization titres are presented on a log<sub>2</sub> scale. Each data point indicates an individual participant. Dotted lines indicate cutoff thresholds. Statistical significance was assessed by Spearman's rank correlation.

**Figure S3.** Paired analysis of serum antibody measurements in participants with Omicron reinfections

**A.** Omicron BA.1 neutralization increases after Omicron reinfection

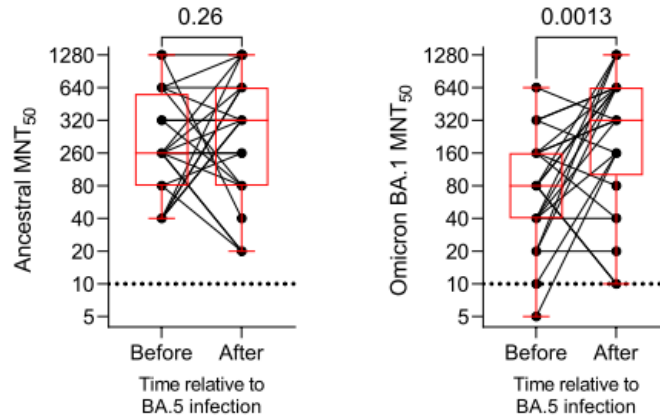

**B.** Serum anti-spike IgA antibodies increase after Omicron reinfection

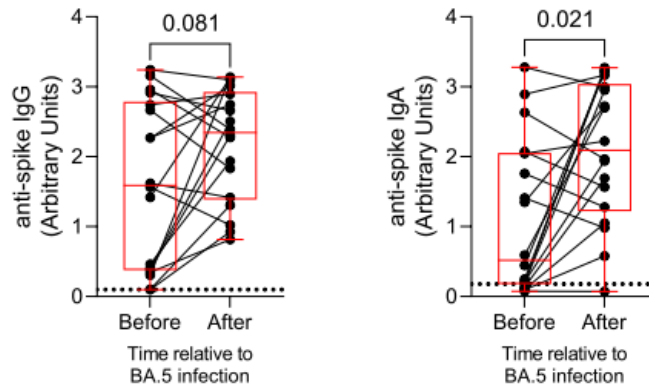

**C.** Serum anti-RBD IgG and IgA antibodies increase after Omicron reinfection

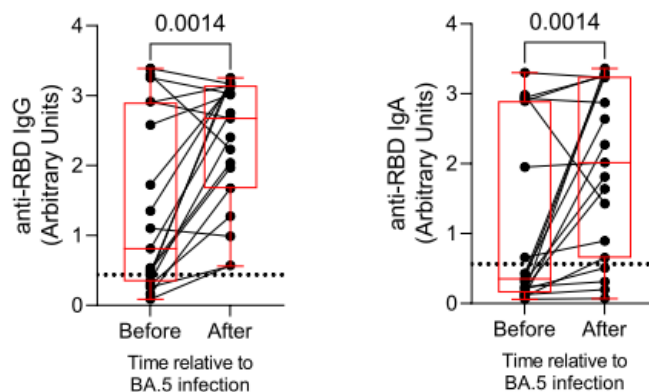

Panel A shows microneutralization titres (MNT<sub>50</sub>) of serum antibodies against ancestral and Omicron BA.1 SARS-CoV-2. Serum anti-spike (Panel B) and anti-RBD (receptor binding domain; Panel C) IgG and IgA antibodies were assessed by ELISA. Data are presented as box and whisker plots, minimum to maximum, with the center line at the median. Each data point indicates an individual participant, with lines joining data before and after Omicron BA.5 infection (i.e., Omicron reinfection). Data in Panel A are presented on a log<sub>2</sub> scale. Dotted lines indicate cutoff thresholds. Statistical significance was assessed by Wilcoxon matched-pairs signed rank test. All P-values are shown.

**Table S1.** Cohort comorbidities at baseline by observation period outcome<sup>a</sup>

|                  | <b>No Infection</b> | <b>Omicron Infection</b> | <b>Total</b> |
|------------------|---------------------|--------------------------|--------------|
| Participants (N) | 558                 | 129                      | 657          |
| Missing (N)      | 59                  | 4                        | 63           |
| 0                | 3 (0.5%)            | 0 (0.0%)                 | 3 (0.4%)     |
| 1                | 18 (3.2%)           | 4 (3.1%)                 | 22 (3.2%)    |
| 2                | 63 (11.3%)          | 14 (10.9%)               | 77 (11.2%)   |
| 3                | 85 (15.2%)          | 20 (15.5%)               | 105 (15.3%)  |
| 4                | 115 (20.6%)         | 30 (23.3%)               | 145 (21.1%)  |
| 5                | 105 (18.8%)         | 19 (14.7%)               | 124 (18.1%)  |
| 6                | 066 (11.8%)         | 17 (13.2%)               | 83 (12.1%)   |
| 7+               | 103 (18.5%)         | 25 (19.4%)               | 128 (18.6%)  |

<sup>a</sup>Data as of baseline on July 1, 2022

<sup>b</sup>Comorbidities: Alzheimer's disease/dementia, angina, back problems, bowel disorder, cancer, cataracts, diabetes, emphysema, glaucoma, heart disease, hypertension, kidney disease, macular degeneration, memory problems, osteoarthritis, osteoporosis, Parkinson's disease, peripheral vascular disease, rheumatoid arthritis, stomach ulcers, stroke, thyroidism, and transient ischemic attack.

**Table S2.** List of immunosuppressive medications<sup>a</sup>

| Class                                                  | Generic Name(s)                          | Brand Name(s)                                     |
|--------------------------------------------------------|------------------------------------------|---------------------------------------------------|
| <b>Steroids</b>                                        | prednisone                               |                                                   |
|                                                        | dexamethasone                            | Decadron                                          |
|                                                        | methylprednisolone                       | DepoMedrol, SoluMedrol, Medrol                    |
| <b>Antimetabolites</b>                                 | cyclophosphamide                         | Procytox                                          |
|                                                        | leflunomide                              | Arava                                             |
|                                                        | methotrexate                             | Trexall, Metoject, Otrexup, Rasuvo, Rheumatrex    |
|                                                        | azathioprine                             | Imuran                                            |
|                                                        | 6-mercaptopurine (6-MP)                  | Purinethol                                        |
|                                                        | mycophenolic acid                        | Myfortic                                          |
|                                                        | mycophenolate mofetil                    | Cellcept                                          |
| <b>Calcineurin inhibitors / mTOR kinase inhibitor</b>  | tacrolimus                               | Prograf, Advagraf, Envarsus PA                    |
|                                                        | cyclosporine                             | Neoral, Gengraf, Sandimmune                       |
|                                                        | sirolimus                                | Rapamune                                          |
| <b>JAK (Janus kinase) inhibitors</b>                   | baricitinib                              | Olumiant                                          |
|                                                        | tofacitinib                              | Xeljanz                                           |
|                                                        | upadacitinib                             | Rinvoq                                            |
| <b>anti-TNF (tumor necrosis factor)</b>                | adalimumab                               | Humira, Amgevita, Hadlima, Hulio, Hyrimoz, Idacio |
|                                                        | golimumab                                | Simponi                                           |
|                                                        | certolizumab pegol                       | Cimzia                                            |
|                                                        | etanercept                               | Enbrel, Brenzys, Erelzi                           |
|                                                        | infliximab                               | Remicade, Avsola, Inflectra, Remsima, Renflexis   |
| <b>Anti-inflammatory</b>                               | sulfasalazine                            | Salazopyrin, Azulfidine                           |
|                                                        | 5-Aminosalicylic Acid (ASA) / mesalamine | Pentasa                                           |
| <b>Anti-CD20</b>                                       | rituximab                                | Rituxan, Ruxience, Riximyo, Truxima, Riabni       |
|                                                        | ocrelizumab                              | Ocrevus                                           |
| <b>IL-1 RA (interleukin-1 receptor antagonist)</b>     | anakinra                                 | Kineret                                           |
|                                                        | canakinumab                              | Ilaris                                            |
| <b>Anti-IL6</b>                                        | tocilizumab                              | Actemra                                           |
|                                                        | sarilumab                                | Kevzara                                           |
| <b>Anti-IL12/IL23</b>                                  | ustekinumab                              | Stelara                                           |
| <b>Anti-IL17</b>                                       | secukinumab                              | Cosentyx                                          |
|                                                        | ixekizumab                               | Taltz                                             |
| <b>Anti-IL17R</b>                                      | brodalumab                               | Siliq                                             |
| <b>Anti-BLyS</b>                                       | belimumab                                | Benlysta                                          |
| <b>Anti-IL23</b>                                       | guselkumab                               | Tremfya                                           |
|                                                        | risankizumab                             | Skyrizi                                           |
| <b>Selective T-cell costimulation blocker</b>          | abatacept                                | Orencia                                           |
| <b>S1PR (sphingosine 1-phosphate receptor) agonist</b> | fingolimod                               | Gilenya                                           |
|                                                        | siponimod                                | Mayzent                                           |
|                                                        | ozanimod                                 | Zeposia                                           |
| <b>Phosphodiesterase inhibitors</b>                    | apremilast                               | Otezla                                            |
| <b>Anti-integrin</b>                                   | vedolizumab                              | Entyvio                                           |

<sup>a</sup>Immunosuppressive medications likely to affect SARS-CoV-2 vaccination responses were identified from guidelines of the Ontario Ministry of Health: <https://www.phsd.ca/wp-content/uploads/2021/10/Guide-to-Verifying-Immunosuppressant-Prescriptions-for-Third-Doses-2021-10-15-FINAL.pdf>.

**Table S3.** Summary of participants taking immunosuppressive medications

| <b>Class</b>                                   | <b>Generic Name(s)</b>                   | <b>Number of Participants<sup>a</sup></b> |
|------------------------------------------------|------------------------------------------|-------------------------------------------|
| Steroids                                       | prednisone                               | 9                                         |
|                                                | methylprednisolone                       | 7                                         |
|                                                | dexamethasone                            | 3                                         |
| Antimetabolites                                | methotrexate                             | 5                                         |
|                                                | mycophenolate mofetil                    | 1                                         |
|                                                | leflunomide                              | 3                                         |
| Calcineurin inhibitors / mTOR kinase inhibitor | tacrolimus                               | 2                                         |
| Anti-IL23                                      | guselkumab                               | 1                                         |
| JAK (Janus kinase) inhibitors                  | tofacitinib                              | 1                                         |
| Anti-inflammatory                              | 5-Aminosalicylic Acid (ASA) / mesalamine | 1                                         |

<sup>a</sup>Four participants were taking more than one immunosuppressive medication.

**Table S4.** Analysis of maximum likelihood estimates of risk of SARS-CoV-2 Omicron infection between July 1 and September 13, 2022

| Parameter                                                     | Estimate | Standard Error | Chi-Square | Pr > ChiSq | Hazard Ratio | 95% Hazard Ratio Confidence Limits |       |
|---------------------------------------------------------------|----------|----------------|------------|------------|--------------|------------------------------------|-------|
| Age (years)                                                   | -0.004   | 0.009          | 0.183      | 0.67       | 1.00         | 0.98                               | 1.01  |
| Female vs Male                                                | -0.005   | 0.190          | 0.001      | 0.98       | 1.00         | 0.69                               | 1.44  |
| (0-8 days)<br>Prior Omicron infection vs Never Infected       | 0.778    | 0.888          | 0.768      | 0.38       | 2.18         | 0.38                               | 12.42 |
| (9-29 days)<br>Prior Omicron Infection vs Never Infected      | 3.864    | 0.356          | 117.860    | <0.0001    | 47.67        | 23.73                              | 95.76 |
| (30-75 days)<br>Prior Omicron Infection vs Never Infected     | 0.512    | 0.626          | 0.667      | 0.41       | 1.67         | 0.49                               | 5.69  |
| Pre-Omicron Infection vs Never Infected                       | 0.341    | 0.390          | 0.765      | 0.38       | 1.41         | 0.66                               | 3.02  |
| Multiple Pre-Omicron Infections vs Never Infected             | -0.644   | 0.605          | 1.133      | 0.29       | 0.53         | 0.16                               | 1.72  |
| mRNA-1273 x4 vs BNT162b2 x4                                   | 0.382    | 0.395          | 0.933      | 0.33       | 1.47         | 0.68                               | 3.18  |
| Other mRNA combination x4 vs BNT162b2 x4                      | -0.725   | 0.318          | 5.196      | 0.023      | 0.49         | 0.26                               | 0.90  |
| Retirement Home vs Long-Term Care Home                        | -0.525   | 0.534          | 0.967      | 0.33       | 0.59         | 0.21                               | 1.69  |
| Number of Residence Outbreaks prior to July 1 2022 (>6 vs ≤6) | -0.055   | 0.476          | 0.013      | 0.91       | 0.95         | 0.37                               | 2.41  |
| Clinical Frailty Scale: 6 vs <6 <sup>a</sup>                  | 0.003    | 0.511          | 0.00004    | 0.99       | 1.00         | 0.37                               | 2.73  |
| Clinical Frailty Scale: >6 vs <6 <sup>a</sup>                 | 0.241    | 0.487          | 0.245      | 0.62       | 1.27         | 0.49                               | 3.31  |
| Clinical Frailty Scale: Missing vs <6 <sup>a</sup>            | 0.100    | 0.580          | 0.030      | 0.86       | 1.11         | 0.36                               | 3.44  |
| Time since fourth vaccination (days)                          | 0.001    | 0.003          | 0.181      | 0.67       | 1.00         | 1.00                               | 1.01  |

<sup>a</sup>Clinical Frailty Scale was not available for all participants, so a 'missing' variable was integrated into the regression analysis. This analysis was also repeated in a subset of participants with complete CFS information, with similar observations, shown in Supplementary Table S5 and Supplementary Figure S1.



**Table S5.** Analysis of maximum likelihood estimates of risk of SARS-CoV-2 Omicron infection between July 1 and September 13, 2022 – complete frailty dataset

| Parameter                                                     | Estimate | Standard Error | Chi-Square | Pr > ChiSq | Hazard Ratio | 95% Hazard Ratio Confidence Limits |        |
|---------------------------------------------------------------|----------|----------------|------------|------------|--------------|------------------------------------|--------|
| Age (years)                                                   | -0.012   | 0.010          | 1.578      | 0.21       | 0.99         | 0.97                               | 1.01   |
| Female vs Male                                                | 0.032    | 0.200          | 0.026      | 0.87       | 1.03         | 0.70                               | 1.53   |
| (0-8 days)<br>Prior Omicron infection vs Never Infected       | 0.207    | 1.174          | 0.031      | 0.86       | 1.23         | 0.12                               | 12.28  |
| (9-29 days)<br>Prior Omicron Infection vs Never Infected      | 3.948    | 0.385          | 105.066    | <0.0001    | 51.81        | 24.36                              | 110.22 |
| (30-75 days)<br>Prior Omicron Infection vs Never Infected     | 0.755    | 0.638          | 1.401      | 0.237      | 2.13         | 0.61                               | 7.43   |
| Pre-Omicron Infection vs Never Infected                       | 0.020    | 0.483          | 0.002      | 0.967      | 1.02         | 0.40                               | 2.63   |
| Multiple Pre-Omicron Infections vs Never Infected             | -0.573   | 0.609          | 0.884      | 0.347      | 0.56         | 0.17                               | 1.86   |
| mRNA-1273 x4 vs BNT162b2 x4                                   | 0.525    | 0.424          | 1.535      | 0.215      | 1.69         | 0.74                               | 3.88   |
| Other mRNA combination x4 vs BNT162b2 x4                      | -0.604   | 0.337          | 3.215      | 0.073      | 0.55         | 0.28                               | 1.06   |
| Retirement Home vs Long-Term Care Home                        | -0.244   | 0.635          | 0.148      | 0.700      | 0.78         | 0.23                               | 2.72   |
| Number of Residence Outbreaks prior to July 1 2022 (>6 vs ≤6) | -0.348   | 0.576          | 0.364      | 0.546      | 0.71         | 0.23                               | 2.19   |
| Clinical Frailty Scale: 6 vs <6                               | -0.156   | 0.525          | 0.089      | 0.766      | 0.86         | 0.31                               | 2.39   |
| Clinical Frailty Scale: >6 vs <6                              | 0.051    | 0.500          | 0.010      | 0.919      | 1.05         | 0.40                               | 2.80   |
| Time since fourth vaccination (days)                          | -0.001   | 0.003          | 0.062      | 0.804      | 1.00         | 0.99                               | 1.01   |

**Table S6.** Immune analysis cohort demographics by early Omicron SARS-CoV-2 infection history<sup>a</sup>

| Pre-July 1, 2022 Infection Status                                                | No Prior Infection  | Early Omicron Infection | P <sup>b</sup> |
|----------------------------------------------------------------------------------|---------------------|-------------------------|----------------|
| N                                                                                | 255                 | 63                      |                |
| <b>Time since early Omicron infection to blood draw (days)</b>                   |                     |                         |                |
| Mean (SD)                                                                        | ..                  | 92 (45)                 | ..             |
| Median (IQR)                                                                     | ..                  | 101 (55 – 127)          | ..             |
| <b>Time from blood draw to observation period (days)</b>                         |                     |                         |                |
| Mean (SD)                                                                        | 50 (25)             | 46 (27)                 | ..             |
| Median (IQR)                                                                     | 51 (31 – 74)        | 52 (22 – 59)            | 0.54           |
| <b>Observation Period Infection Outcome – N (%)</b>                              |                     |                         |                |
| No Omicron Infection                                                             | 227 (89.0%)         | 26 (41.3%)              | <0.0001        |
| Omicron Infection                                                                | 28 (11.0%)          | 37 (58.7%)              |                |
| <b>Age (years)</b>                                                               |                     |                         |                |
| Mean (SD)                                                                        | 84.2 (9.9)          | 84.5 (8.7)              | ..             |
| Median (IQR)                                                                     | 86.8 (80.0 – 91.0)  | 86.2 (80.3 – 91.8)      | 0.86           |
| <b>Sex – N (%)</b>                                                               |                     |                         |                |
| Female                                                                           | 176 (69.0%)         | 40 (63.5%)              | 0.40           |
| Male                                                                             | 79 (31.0%)          | 23 (36.5%)              |                |
| <b>Four-dose mRNA vaccine combination – N (%)</b>                                |                     |                         |                |
| mRNA1273 x4                                                                      | 83 (32.5%)          | 5 (7.9%)                | <0.0001        |
| BNT162b2 x4                                                                      | 126 (49.4%)         | 27 (42.9%)              |                |
| Other mRNA x4                                                                    | 46 (18.0%)          | 31 (49.2%)              |                |
| <b>Time since fourth vaccination to July 1, 2022 baseline (days)<sup>c</sup></b> |                     |                         |                |
| Mean (SD)                                                                        | 147 (23)            | 119 (47)                | ..             |
| Median (IQR)                                                                     | 155 (141 – 158)     | 127 (50 – 161)          | 0.0009         |
| <b>Time since last vaccination to blood draw (days)<sup>c</sup></b>              |                     |                         |                |
| Mean (SD)                                                                        | 98.6 (25.2)         | 137.0 (67.3)            | ..             |
| Median (IQR)                                                                     | 97.0 (79.0 – 113.0) | 111.0 (84.0 – 244.0)    | 0.0008         |
| <b>Residence type – N (%)</b>                                                    |                     |                         |                |
| Long-term care residence                                                         | 130 (51.0%)         | 42 (66.7%)              | 0.025          |
| Retirement residence                                                             | 125 (49.0%)         | 21 (33.3%)              |                |
| <b>Residence outbreaks – N</b>                                                   |                     |                         |                |
| Mean (SD)                                                                        | 6.6 (2.0)           | 6.4 (1.9)               | ..             |
| Median (IQR)                                                                     | 6.0 (5.0 – 7.0)     | 6.0 (5.0 – 7.0)         | 0.34           |
| <b>Participants in residences with outbreaks - N (%)</b>                         |                     |                         |                |
| ≤ 6 (N)                                                                          | 170 (66.7%)         | 43 (68.3%)              | 0.81           |
| > 6 (N)                                                                          | 85 (33.3%)          | 20 (31.7%)              |                |
| <b>Clinical Frailty Scale<sup>d</sup></b>                                        |                     |                         |                |
| Missing (N)                                                                      | 49                  | 4                       | ..             |
| Mean (SD)                                                                        | 6.3 (1.3)           | 6.4 (1.1)               | ..             |
| Median (IQR)                                                                     | 7.0 (6.0 – 7.0)     | 7.0 (6.0 – 7.0)         | 0.83           |
| <b>Clinical Frailty Scale – number of participants – N (%)<sup>d</sup></b>       |                     |                         |                |
| CFS <6 (N)                                                                       | 40 (19.4%)          | 10 (16.9%)              | 0.85           |
| CFS 6 (N)                                                                        | 45 (21.8%)          | 12 (20.3%)              |                |
| CFS >6 (N)                                                                       | 121 (58.7%)         | 37 (62.7%)              |                |
| <b>Comorbidities – N<sup>e</sup></b>                                             |                     |                         |                |
| Missing (N)                                                                      | 17                  | 1                       | ..             |
| Mean (SD)                                                                        | 4.4 (2.2)           | 5.0 (2.3)               | ..             |
| Median (IQR)                                                                     | 4.0 (3.0 – 6.0)     | 5.0 (3.0 – 7.0)         | 0.086          |
| <b>Immunosuppressive medication use – N (%)<sup>f</sup></b>                      |                     |                         |                |
| Missing (N)                                                                      | 47                  | 8                       | ..             |
| No                                                                               | 193 (92.8%)         | 52 (94.6%)              | 0.65           |
| Yes                                                                              | 15 (7.2%)           | 3 (5.5%)                |                |

<sup>a</sup>As of baseline on July 1, 2022, with the exception of age and time since vaccination to blood draw, which were calculated as of blood collection date, between April 1 and June 30, 2022. Residence outbreaks and Clinical Frailty Scale are reported as absolute values and groups of participants.

<sup>b</sup>Data were assessed by non-parametric Mann-Whitney U-test for two-group comparisons of continuous variables including CFS and by Chi-square test for categorical variables.

<sup>c</sup>All participants had four mRNA vaccine vaccinations at the start of the observation window on July 1, 2022. Some participants received their fourth dose between the blood collection date and the start of the observation window.

<sup>d</sup>The Clinical Frailty Scale is a 9-point scale from 1 (very fit) to 9 (terminally ill). Data are reported as the CFS and by grouping participants with a CFS <6 (very fit to living with mild frailty), 6 (living with moderate frailty), and >6 (living with severe frailty to terminally ill).

<sup>e</sup>Incidence of comorbidities is also summarized in Supplementary Table S7. List of comorbidities: Alzheimer's disease/dementia, angina, back problems, bowel disorder, cancer, cataracts, diabetes, emphysema, glaucoma, heart disease, hypertension, kidney disease, macular degeneration, memory problems, osteoarthritis, osteoporosis, Parkinson's disease, peripheral vascular disease, rheumatoid arthritis, stomach ulcers, stroke, thyroidism, and transient ischemic attack.

<sup>f</sup>Number of participants prescribed immunosuppressive medications; a list of medications is provided in Supplementary Table S2.

**Table S7.** Immune analysis cohort comorbidities by early Omicron SARS-CoV-2 infection history and observation period outcome<sup>a</sup>

| Infection outcome                      | No Prior Infection |                   |            | Prior Omicron Infection |                   |            |
|----------------------------------------|--------------------|-------------------|------------|-------------------------|-------------------|------------|
|                                        | No Infection       | Omicron Infection | Total      | No Infection            | Omicron Infection | Total      |
| Participants (N)                       | 212                | 26                | 238        | 25                      | 37                | 62         |
| Missing (N)                            | 15                 | 2                 | 17         | 1                       | 0                 | 1          |
| <b>Number of Comorbidities – N (%)</b> |                    |                   |            |                         |                   |            |
| 0                                      | 1 (0.05%)          | 0 (0.0%)          | 1 (0.004%) | 0 (0.0%)                | 0 (0.0%)          | 0 (0.0%)   |
| 1                                      | 13 (6.1%)          | 1 (3.8%)          | 14 (5.9%)  | 3 (12.0%)               | 1 (2.7%)          | 4 (6.5%)   |
| 2                                      | 30 (14.2%)         | 4 (15.4%)         | 34 (14.3%) | 0 (0.0%)                | 2 (5.4%)          | 2 (3.2%)   |
| 3                                      | 33 (15.6%)         | 5 (19.2%)         | 38 (16.0%) | 5 (20.0%)               | 7 (18.9%)         | 12 (19.4%) |
| 4                                      | 40 (18.9%)         | 8 (30.7%)         | 48 (20.2%) | 5 (20.0%)               | 7 (18.9%)         | 12 (19.4%) |
| 5                                      | 40 (18.9%)         | 2 (7.7%)          | 42 (17.6%) | 4 (16.0%)               | 6 (16.2%)         | 10 (16.1%) |
| 6                                      | 21 (9.9%)          | 2 (7.7%)          | 23 (9.7%)  | 0 (0.0%)                | 6 (16.2%)         | 6 (9.7%)   |
| 7+                                     | 34 (16.0%)         | 4 (15.4%)         | 38 (16.0%) | 8 (32.0%)               | 8 (21.6%)         | 16 (25.8%) |

<sup>a</sup>Comorbidities: Alzheimer's disease/dementia, angina, back problems, bowel disorder, cancer, cataracts, diabetes, emphysema, glaucoma, heart disease, hypertension, kidney disease, macular degeneration, memory problems, osteoarthritis, osteoporosis, Parkinson's disease, peripheral vascular disease, rheumatoid arthritis, stomach ulcers, stroke, thyroidism, and transient ischemic attack.

**Table S8.** Immune analysis cohort demographics by early Omicron SARS-CoV-2 infection history and observation period outcome<sup>a</sup>

| Observation Period Infection Outcome                                       | No Prior Infection<br>N=255 |                    |         | Prior Omicron Infection<br>N=63 |                    |                |
|----------------------------------------------------------------------------|-----------------------------|--------------------|---------|---------------------------------|--------------------|----------------|
|                                                                            | No Infection                | Omicron Infection  | P       | No Infection                    | Omicron Infection  | P <sup>b</sup> |
| N                                                                          | 227                         | 28                 | ..      | 26                              | 37                 | ..             |
| <b>Time since blood draw to July 1, 2022 baseline (days)</b>               |                             |                    |         |                                 |                    |                |
| Mean (SD)                                                                  | 50 (25)                     | 53 (23)            | ..      | 41 (29)                         | 50 (26)            | ..             |
| Median (IQR)                                                               | 50 (31 – 74)                | 58 (37 – 75)       | 0.41    | 43 (22 – 56)                    | 57 (33 – 59)       | 0.095          |
| <b>Time since early Omicron infection to blood draw (days)</b>             |                             |                    |         |                                 |                    |                |
| Mean (SD)                                                                  | ..                          | ..                 | ..      | 99 (50)                         | 87 (42)            | ..             |
| Median (IQR)                                                               | ..                          | ..                 | ..      | 105 (49 – 139)                  | 101 (65 – 108)     | 0.34           |
| <b>Time from blood draw to Omicron infection (days)</b>                    |                             |                    |         |                                 |                    |                |
| Mean (SD)                                                                  | ..                          | 96 (23)            | ..      | ..                              | 67 (27)            | ..             |
| Median (IQR)                                                               | ..                          | 96 (89 – 107)      | ..      | ..                              | 72 (48 – 79)       | ..             |
| <b>Age (years)</b>                                                         |                             |                    |         |                                 |                    |                |
| Mean (SD)                                                                  | 84.6 (9.5)                  | 81.5 (12.7)        | ..      | 84.1 (8.1)                      | 84.8 (9.2)         | ..             |
| Median (IQR)                                                               | 87.1 (80.5 – 91.1)          | 86.3 (73.1 – 90.8) | 0.43    | 83.9 (79.1 – 91.2)              | 86.6 (80.5 – 92.2) | 0.61           |
| <b>Sex – N (%)</b>                                                         |                             |                    |         |                                 |                    |                |
| Female                                                                     | 156 (68.7%)                 | 20 (71.4%)         | 0.77    | 18 (69.2%)                      | 22 (59.5%)         | 0.43           |
| Male                                                                       | 71 (31.3%)                  | 8 (28.6%)          |         | 8 (30.8%)                       | 15 (40.5%)         |                |
| <b>Four-dose mRNA vaccine combination – N (%)</b>                          |                             |                    |         |                                 |                    |                |
| mRNA1273 x4                                                                | 63 (27.8%)                  | 20 (71.4%)         | <0.0001 | 1 (3.8%)                        | 4 (10.8%)          | 0.0099         |
| BNT162b2 x4                                                                | 122 (53.7%)                 | 4 (14.3%)          |         | 17 (65.4%)                      | 10 (27.0%)         |                |
| Other mRNA combination x4                                                  | 42 (18.5%)                  | 4 (14.3%)          |         | 8 (30.8%)                       | 23 (62.2%)         |                |
| <b>Time since fourth vaccination to baseline (days)<sup>c</sup></b>        |                             |                    |         |                                 |                    |                |
| Mean (SD)                                                                  | 147 (24)                    | 149 (10)           | ..      | 138 (27)                        | 106 (53)           | ..             |
| Median (IQR)                                                               | 155 (140 – 159)             | 148 (145 – 157)    | 0.33    | 150 (117 – 157)                 | 113 (50 – 163)     | 0.10           |
| <b>Time since last vaccination to blood draw (days)<sup>c</sup></b>        |                             |                    |         |                                 |                    |                |
| Mean (SD)                                                                  | 99 (25)                     | 96 (24)            | ..      | 97 (27)                         | 165 (73)           | ..             |
| Median (IQR)                                                               | 97 (79 – 113)               | 89 (83 – 120)      | 0.71    | 87 (77 – 108)                   | 126 (96 – 244)     | 0.0001         |
| <b>Residence type – N (%)</b>                                              |                             |                    |         |                                 |                    |                |
| Long-term care                                                             | 107 (47.2%)                 | 23 (82.1%)         | 0.0005  | 10 (38.5%)                      | 32 (86.5%)         | <0.0001        |
| Retirement                                                                 | 120 (52.9%)                 | 5 (17.9%)          |         | 15 (57.7%)                      | 5 (13.5%)          |                |
| <b>Residence outbreaks – N</b>                                             |                             |                    |         |                                 |                    |                |
| Mean (SD)                                                                  | 6.6 (2.0)                   | 6.5 (2.0)          | ..      | 7.3 (2.4)                       | 5.7 (1.1)          | ..             |
| Median (IQR)                                                               | 6.0 (6.0 – 7.0)             | 6.0 (5.0 – 7.0)    | 0.59    | 6.0 (6.0 – 9.5)                 | 6.0 (5.0 – 6.0)    | 0.0016         |
| <b>Participants in residences with outbreaks - N (%)</b>                   |                             |                    |         |                                 |                    |                |
| ≤ 6 outbreaks                                                              | 152 (67.0%)                 | 18 (64.3%)         | 0.78    | 11 (42.3%)                      | 32 (86.5%)         | 0.0002         |
| > 6 outbreaks                                                              | 75 (33.0%)                  | 10 (35.7%)         |         | 15 (57.6%)                      | 5 (13.5%)          |                |
| <b>Clinical Frailty Scale<sup>d</sup></b>                                  |                             |                    |         |                                 |                    |                |
| Missing (N)                                                                | 45                          | 4                  | ..      | 3                               | 1                  | ..             |
| Mean (SD)                                                                  | 6.3 (1.3)                   | 6.7 (0.8)          | ..      | 6.0 (1.2)                       | 6.6 (0.8)          | ..             |
| Median (IQR)                                                               | 7.0 (6.0 – 7.0)             | 7.0 (6.0 – 7.0)    | 0.14    | 6.0 (5.0 – 7.0)                 | 7.0 (7.0 – 7.0)    | 0.0062         |
| <b>Clinical Frailty Scale – number of participants – N (%)<sup>d</sup></b> |                             |                    |         |                                 |                    |                |
| CFS < 6 (N)                                                                | 38 (20.9%)                  | 2 (8.3%)           | 0.30    | 7 (30.4%)                       | 3 (8.3%)           | 0.0097         |
| CFS = 6 (N)                                                                | 40 (22.0%)                  | 5 (10.8%)          |         | 7 (30.4%)                       | 5 (13.9%)          |                |
| CFS > 6 (N)                                                                | 104 (57.1%)                 | 17 (70.8%)         |         | 9 (39.1%)                       | 28 (77.8%)         |                |
| <b>Comorbidities - N<sup>e</sup></b>                                       |                             |                    |         |                                 |                    |                |
| Missing (N)                                                                | 15                          | 2                  | ..      | 1                               | 0                  | ..             |
| Mean (SD)                                                                  | 4.4 (2.1)                   | 4.3 (2.4)          | ..      | 5.0 (2.8)                       | 4.9 (2.0)          | ..             |
| Median (IQR)                                                               | 4.0 (3.0 – 6.0)             | 4.0 (3.0 – 5.3)    | 0.59    | 4.0 (3.0 – 7.0)                 | 5.0 (3.0 – 6.0)    | 0.91           |
| <b>Immunosuppressive medication use – N (%)<sup>f</sup></b>                |                             |                    |         |                                 |                    |                |
| Missing                                                                    | 45                          | 2                  | ..      | 6                               | 2                  | ..             |
| No                                                                         | 167 (91.8%)                 | 26 (100.0%)        | ..      | 17 (85.0%)                      | 35 (100.0%)        | ..             |
| Yes                                                                        | 15 (8.2%)                   | 0 (0.0%)           |         | 3 (15.0%)                       | 0 (0.0%)           |                |

<sup>a</sup>As of baseline on July 1, 2022, with the exception of age and time since vaccination to blood draw, which were calculated as of blood collection date, between April 1 and June 30, 2022.

Residence outbreaks and Clinical Frailty Scale are reported as absolute values and groups of participants.

<sup>b</sup>Data were assessed by non-parametric Mann-Whitney U-test for two-group comparisons of continuous variables including CFS and by Chi-square test for categorical variables.

<sup>c</sup>All participants had four mRNA vaccine vaccinations at the start of the observation window on July 1, 2022. Some participants received their fourth dose between the blood collection date and the start of the observation window.

<sup>d</sup>The Clinical Frailty Scale is a 9-point scale from 1 (very fit) to 9 (terminally ill). Data are reported as the CFS and by grouping participants with a CFS <6 (very fit to living with mild frailty), 6 (living with moderate frailty), and >6 (living with severe frailty to terminally ill).

<sup>e</sup>Incidence of comorbidities is also summarized in Supplementary Table S7. List of comorbidities: Alzheimer's disease/dementia, angina, back problems, bowel disorder, cancer, cataracts, diabetes, emphysema, glaucoma, heart disease, hypertension, kidney disease, macular degeneration, memory problems, osteoarthritis, osteoporosis, Parkinson's disease, peripheral vascular disease, rheumatoid arthritis, stomach ulcers, stroke, thyroidism, and transient ischemic attack.

<sup>f</sup>Number of participants prescribed immunosuppressive medications; a list of medications is provided in Supplementary Table S2.

**Table S9.** Humoral and cellular assessments by SARS-CoV-2 Omicron infection history before the observation period<sup>a</sup>

|                                                                                                                           | No prior Omicron infection | Prior Omicron infection | Total              | P Value |
|---------------------------------------------------------------------------------------------------------------------------|----------------------------|-------------------------|--------------------|---------|
| <b>Anti-spike IgG (AU)</b>                                                                                                |                            |                         |                    |         |
| N                                                                                                                         | 176                        | 50                      | 226                | ..      |
| Mean (SD)                                                                                                                 | 1.58 (1.06)                | 1.88 (0.97)             | 1.64 (1.04)        | ..      |
| Median (IQR)                                                                                                              | 1.38 (0.55 – 2.75)         | 2.13 (1.09 – 2.80)      | 1.65 (0.58 – 2.75) | 0.061   |
| <b>Anti-spike IgA (AU)</b>                                                                                                |                            |                         |                    |         |
| N                                                                                                                         | 176                        | 50                      | 226                | ..      |
| Mean (SD)                                                                                                                 | 0.61 (0.71)                | 1.33 (1.07)             | 0.77 (0.85)        | ..      |
| Median (IQR)                                                                                                              | 0.32 (0.16 – 0.75)         | 1.03 (0.31 – 2.31)      | 0.38 (0.18 – 1.00) | <0.0001 |
| <b>Anti-RBD IgG (AU)</b>                                                                                                  |                            |                         |                    |         |
| N                                                                                                                         | 176                        | 50                      | 226                | ..      |
| Mean (SD)                                                                                                                 | 1.29 (0.85)                | 2.02 (1.10)             | 1.45 (0.96)        | ..      |
| Median (IQR)                                                                                                              | 1.11 (0.51 – 1.79)         | 2.41 (0.98 – 2.93)      | 1.22 (0.53 – 2.23) | <0.0001 |
| <b>Anti-RBD IgA (AU)</b>                                                                                                  |                            |                         |                    |         |
| N                                                                                                                         | 176                        | 50                      | 226                | ..      |
| Mean (SD)                                                                                                                 | 0.60 (0.71)                | 1.38 (1.11)             | 0.77 (0.87)        | ..      |
| Median (IQR)                                                                                                              | 0.31 (0.21 – 0.61)         | 1.28 (0.30 – 2.53)      | 0.37 (0.22 – 0.82) | <0.0001 |
| <b>Ancestral SARS-CoV-2 neutralization (MNT50)</b>                                                                        |                            |                         |                    |         |
| N                                                                                                                         | 253                        | 63                      | 316                | ..      |
| Mean (SD)                                                                                                                 | 203 (303)                  | 368 (388)               | 236 (328)          | ..      |
| Median (IQR)                                                                                                              | 80 (40 – 160)              | 160 (80 – 640)          | 80 (40 – 320)      | <0.0001 |
| <b>Omicron BA.1 SARS-CoV-2 neutralization (MNT50)</b>                                                                     |                            |                         |                    |         |
| N                                                                                                                         | 253                        | 63                      | 316                | ..      |
| Mean (SD)                                                                                                                 | 95 (207)                   | 274 (408)               | 131 (269)          | ..      |
| Median (IQR)                                                                                                              | 20 (10 – 80)               | 80 (40 – 320)           | 40 (10 – 80)       | <0.0001 |
| <b>Ancestral SARS-CoV-2 complete spike memory AIM<sup>+</sup>CD4<sup>+</sup> T cells (%CD4<sup>+</sup> T cells)</b>       |                            |                         |                    |         |
| N                                                                                                                         | 199                        | 48                      | 247                | ..      |
| Mean (SD)                                                                                                                 | 3.90 (2.87)                | 3.47 (2.13)             | 3.82 (2.74)        | ..      |
| Median (IQR)                                                                                                              | 3.34 (1.83-5.18)           | 3.24 (1.97-4.40)        | 3.34 (1.83-5.05)   | 0.65    |
| <b>Ancestral SARS-CoV-2 immunodominant spike memory AIM<sup>+</sup>CD4<sup>+</sup> T cells (%CD4<sup>+</sup> T cells)</b> |                            |                         |                    |         |
| N                                                                                                                         | 199                        | 48                      | 247                | ..      |
| Mean (SD)                                                                                                                 | 3.44 (2.80)                | 3.21 (2.13)             | 3.40 (2.68)        | ..      |
| Median (IQR)                                                                                                              | 2.50 (1.59 – 4.49)         | 3.13 (1.48 – 4.39)      | 2.59 (1.54 – 4.49) | 0.89    |
| <b>Omicron BA.1 SARS-CoV-2 complete spike memory AIM<sup>+</sup>CD4<sup>+</sup> T cells (%CD4<sup>+</sup> T cells)</b>    |                            |                         |                    |         |
| N                                                                                                                         | 167                        | 41                      | 208                | ..      |
| Mean (SD)                                                                                                                 | 2.78 (2.20)                | 2.77 (1.76)             | 2.78 (2.12)        | ..      |
| Median (IQR)                                                                                                              | 2.29 (1.29-3.69)           | 2.35 (1.48-3.51)        | 2.30 (1.34-3.65)   | 0.72    |
| <b>Ancestral SARS-CoV-2 complete spike memory AIM<sup>+</sup>CD8<sup>+</sup> T cells (%CD8<sup>+</sup> T cells)</b>       |                            |                         |                    |         |
| N                                                                                                                         | 192                        | 46                      | 238                | ..      |
| Mean (SD)                                                                                                                 | 1.08 (1.61)                | 1.39 (1.71)             | 1.14 (1.63)        | ..      |
| Median (IQR)                                                                                                              | 0.49 (0.18-1.27)           | 0.64 (0.22-1.85)        | 0.50 (0.19-1.41)   | 0.24    |
| <b>Ancestral SARS-CoV-2 immunodominant spike memory AIM<sup>+</sup>CD8<sup>+</sup> T cells (%CD8<sup>+</sup> T cells)</b> |                            |                         |                    |         |
| N                                                                                                                         | 192                        | 46                      | 238                | ..      |
| Mean (SD)                                                                                                                 | 0.48 (1.09)                | 0.35 (0.56)             | 0.46 (1.01)        | ..      |
| Median (IQR)                                                                                                              | 0.14 (0.00 – 0.40)         | 0.10 (0.01 – 0.52)      | 0.13 (0.00 – 0.41) | 0.84    |
| <b>Omicron BA.1 SARS-CoV-2 complete spike memory AIM<sup>+</sup>CD8<sup>+</sup> T cells (%CD8<sup>+</sup> T cells)</b>    |                            |                         |                    |         |
| N                                                                                                                         | 160                        | 39                      | 199                | ..      |
| Mean (SD)                                                                                                                 | 0.46 (1.14)                | 0.26 (0.36)             | 0.42 (1.04)        | ..      |
| Median (IQR)                                                                                                              | 0.14 (0.029-0.52)          | 0.11 (0.014-0.40)       | 0.14 (0.020-0.48)  | 0.40    |

<sup>a</sup>Immunological assessments were performed on blood collected between within three months before the start of the observation period.

**Table S10.** Humoral and cellular assessments in individuals with no prior SARS-CoV-2 Omicron infection by Omicron infection outcome during the observation period<sup>a</sup>

|                                                                                                                           | Not infected with Omicron | Infected with Omicron | Total              | P Value |
|---------------------------------------------------------------------------------------------------------------------------|---------------------------|-----------------------|--------------------|---------|
| <b>Anti-spike IgG (AU)</b>                                                                                                |                           |                       |                    |         |
| N                                                                                                                         | 156                       | 20                    | 176                | ..      |
| Mean (SD)                                                                                                                 | 1.54 (1.05)               | 1.87 (1.06)           | 1.58 (1.06)        | ..      |
| Median (IQR)                                                                                                              | 1.34 (0.54 – 2.74)        | 2.33 (0.73 – 2.82)    | 1.38 (0.55 – 2.75) | 0.19    |
| <b>Anti-spike IgA (AU)</b>                                                                                                |                           |                       |                    |         |
| N                                                                                                                         | 156                       | 20                    | 176                | ..      |
| Mean (SD)                                                                                                                 | 0.61 (0.70)               | 0.66 (0.84)           | 0.61 (0.71)        | ..      |
| Median (IQR)                                                                                                              | 0.34 (0.16 – 0.75)        | 0.28 (0.16 – 0.76)    | 0.32 (0.16 – 0.75) | 0.97    |
| <b>Anti-RBD IgG (AU)</b>                                                                                                  |                           |                       |                    |         |
| N                                                                                                                         | 156                       | 20                    | 176                | ..      |
| Mean (SD)                                                                                                                 | 1.26 (0.84)               | 1.51 (0.95)           | 1.29 (0.85)        | ..      |
| Median (IQR)                                                                                                              | 1.10 (0.50 – 1.78)        | 1.30 (0.80 – 2.42)    | 1.11 (0.51 – 1.79) | 0.26    |
| <b>Anti-RBD IgA (AU)</b>                                                                                                  |                           |                       |                    |         |
| N                                                                                                                         | 156                       | 20                    | 176                | ..      |
| Mean (SD)                                                                                                                 | 0.59 (0.70)               | 0.66 (0.81)           | (0.60 – 0.71)      | ..      |
| Median (IQR)                                                                                                              | 0.31 (0.22 – 0.60)        | 0.33 (0.19 – 0.77)    | 0.31 (0.21 – 0.61) | 0.91    |
| <b>Ancestral SARS-CoV-2 neutralization (MNT50)</b>                                                                        |                           |                       |                    |         |
| N                                                                                                                         | 225                       | 28                    | 253                | ..      |
| Mean (SD)                                                                                                                 | 199 (297)                 | 231 (354)             | 203 (303)          | ..      |
| Median (IQR)                                                                                                              | 80 (40 – 160)             | 80 (20 – 240)         | 80 (40 – 160)      | 0.73    |
| <b>Omicron BA.1 SARS-CoV-2 neutralization (MNT50)</b>                                                                     |                           |                       |                    |         |
| N                                                                                                                         | 225                       | 28                    | 253                | ..      |
| Mean (SD)                                                                                                                 | 99 (217)                  | 58 (86)               | 95 (207)           | ..      |
| Median (IQR)                                                                                                              | 20 (10 – 80)              | 20 (5 – 80)           | 20 (10 – 80)       | 0.44    |
| <b>Ancestral SARS-CoV-2 complete spike memory AIM<sup>+</sup>CD4<sup>+</sup> T cells (%CD4<sup>+</sup> T cells)</b>       |                           |                       |                    |         |
| N                                                                                                                         | 177                       | 22                    | 199                | ..      |
| Mean (SD)                                                                                                                 | 3.92 (2.89)               | 3.73 (2.76)           | 3.90 (2.87)        | ..      |
| Median (IQR)                                                                                                              | 3.43 (1.85-5.23)          | 3.16 (1.64-4.85)      | 3.34 (1.83-5.18)   | 0.75    |
| <b>Ancestral SARS-CoV-2 immunodominant spike memory AIM<sup>+</sup>CD4<sup>+</sup> T cells (%CD4<sup>+</sup> T cells)</b> |                           |                       |                    |         |
| N                                                                                                                         | 177                       | 22                    | 199                | ..      |
| Mean (SD)                                                                                                                 | 3.47 (2.83)               | 3.24 (2.53)           | 3.44 (2.80)        | ..      |
| Median (IQR)                                                                                                              | 2.47 (1.60 – 4.52)        | 2.68 (1.55 – 4.08)    | 2.50 (1.59 – 4.49) | 0.85    |
| <b>Omicron BA.1 SARS-CoV-2 complete spike memory AIM<sup>+</sup>CD4<sup>+</sup> T cells (%CD4<sup>+</sup> T cells)</b>    |                           |                       |                    |         |
| N                                                                                                                         | 150                       | 17                    | 157                | ..      |
| Mean (SD)                                                                                                                 | 2.82 (2.21)               | 2.48 (2.16)           | 2.78 (2.20)        | ..      |
| Median (IQR)                                                                                                              | 2.33 (2.40-2.85)          | 1.89 (0.99-3.61)      | 2.29 (1.29-3.69)   | 0.35    |
| <b>Ancestral SARS-CoV-2 complete spike memory AIM<sup>+</sup>CD8<sup>+</sup> T cells (%CD8<sup>+</sup> T cells)</b>       |                           |                       |                    |         |
| N                                                                                                                         | 171                       | 21                    | 192                | ..      |
| Mean (SD)                                                                                                                 | 1.07 (1.59)               | 1.15 (1.81)           | 1.08 (1.61)        | ..      |
| Median (IQR)                                                                                                              | 0.64 (0.22-1.85)          | 0.28 (0.18-1.56)      | 0.49 (0.18-1.27)   | 0.69    |
| <b>Ancestral SARS-CoV-2 immunodominant spike memory AIM<sup>+</sup>CD8<sup>+</sup> T cells (%CD8<sup>+</sup> T cells)</b> |                           |                       |                    |         |
| N                                                                                                                         | 171                       | 21                    | 192                | ..      |
| Mean (SD)                                                                                                                 | 0.48 (1.12)               | 0.44 (0.72)           | 0.48 (1.09)        | ..      |
| Median (IQR)                                                                                                              | 0.14 (0.00 – 0.38)        | 0.25 (0.01 – 0.44)    | 0.14 (0.00 – 0.40) | 0.45    |
| <b>Omicron BA.1 SARS-CoV-2 complete spike memory AIM<sup>+</sup>CD8<sup>+</sup> T cells (%CD8<sup>+</sup> T cells)</b>    |                           |                       |                    |         |
| N                                                                                                                         | 144                       | 16                    | 160                | ..      |
| Mean (SD)                                                                                                                 | 0.48 (1.19)               | 0.34 (0.505)          | 0.46 (1.14)        | ..      |
| Median (IQR)                                                                                                              | 0.15 (0.029-0.55)         | 0.11 (0.01-0.44)      | 0.14 (0.029-0.52)  | 0.63    |

<sup>a</sup>Immunological assessments were performed on blood collected between within three months before the start of the observation period.

**Table S11.** Humoral and cellular assessments in individuals with prior Omicron infection by SARS-CoV-2 Omicron infection outcome during the observation period<sup>a</sup>

|                                                                                                                           | Not reinfected with Omicron | Reinfected with Omicron | Total              | P Value |
|---------------------------------------------------------------------------------------------------------------------------|-----------------------------|-------------------------|--------------------|---------|
| <b>Anti-spike IgG (AU)</b>                                                                                                |                             |                         |                    |         |
| N                                                                                                                         | 22                          | 28                      | 50                 | ..      |
| Mean (SD)                                                                                                                 | 2.04 (0.71)                 | 1.75 (1.13)             | 1.88 (0.97)        | ..      |
| Median (IQR)                                                                                                              | 2.13 (1.36 – 2.87)          | 1.96 (0.39 – 2.77)      | 2.13 (1.09 – 2.80) | 0.62    |
| <b>Anti-spike IgA (AU)</b>                                                                                                |                             |                         |                    |         |
| N                                                                                                                         | 22                          | 28                      | 50                 | ..      |
| Mean (SD)                                                                                                                 | 1.84 (0.92)                 | 1.03 (1.12)             | 1.38 (1.11)        | ..      |
| Median (IQR)                                                                                                              | 2.09 (0.98 – 2.69)          | 0.41 (0.18 – 1.86)      | 1.28 (0.30 – 2.53) | 0.0072  |
| <b>Anti-RBD IgG (AU)</b>                                                                                                  |                             |                         |                    |         |
| N                                                                                                                         | 22                          | 28                      | 50                 | ..      |
| Mean (SD)                                                                                                                 | 2.65 (0.64)                 | 1.52 (1.14)             | 2.02 (1.10)        | ..      |
| Median (IQR)                                                                                                              | 2.85 (2.41 – 3.05)          | 1.25 (0.44 – 2.78)      | 2.41 (0.98 – 2.93) | 0.0009  |
| <b>Anti-RBD IgA (AU)</b>                                                                                                  |                             |                         |                    |         |
| N                                                                                                                         | 22                          | 28                      | 50                 | ..      |
| Mean (SD)                                                                                                                 | 1.51 (1.04)                 | 1.19 (1.09)             | 1.33 (1.07)        | ..      |
| Median (IQR)                                                                                                              | 1.35 (0.57 – 2.70)          | 0.69 (0.20 – 2.09)      | 1.03 (0.31 – 2.31) | 0.099   |
| <b>Ancestral SARS-CoV-2 neutralization (MNT50)</b>                                                                        |                             |                         |                    |         |
| N                                                                                                                         | 26                          | 37                      | 63                 | ..      |
| Mean (SD)                                                                                                                 | 489 (450)                   | 283 (317)               | 368 (388)          | ..      |
| Median (IQR)                                                                                                              | 320 (160 – 640)             | 160 (80 – 320)          | 160 (80 – 640)     | 0.079   |
| <b>Omicron BA.1 SARS-CoV-2 neutralization (MNT50)</b>                                                                     |                             |                         |                    |         |
| N                                                                                                                         | 26                          | 37                      | 63                 | ..      |
| Mean (SD)                                                                                                                 | 464 (523)                   | 140 (230)               | 274 (408)          | ..      |
| Median (IQR)                                                                                                              | 160 (80 – 1280)             | 80 (40 – 160)           | 80 (40 – 320)      | 0.0072  |
| <b>Ancestral SARS-CoV-2 complete spike memory AIM<sup>+</sup>CD4<sup>+</sup> T cells (%CD4<sup>+</sup> T cells)</b>       |                             |                         |                    |         |
| N                                                                                                                         | 17                          | 31                      | 48                 | ..      |
| Mean (SD)                                                                                                                 | 3.54 (2.40)                 | 3.44 (2.01)             | 3.47 (2.13)        | ..      |
| Median (IQR)                                                                                                              | 2.65 (1.96-4.22)            | 3.52 (1.91-4.71)        | 3.24 (1.97-4.40)   | 0.81    |
| <b>Ancestral SARS-CoV-2 immunodominant spike memory AIM<sup>+</sup>CD4<sup>+</sup> T cells (%CD4<sup>+</sup> T cells)</b> |                             |                         |                    |         |
| N                                                                                                                         | 17                          | 31                      | 48                 | ..      |
| Mean (SD)                                                                                                                 | 3.13 (1.99)                 | 3.35 (2.41)             | 3.21 (2.13)        | ..      |
| Median (IQR)                                                                                                              | 3.13 (1.47 – 4.53)          | 3.13 (1.59 – 4.66)      | 3.13 (1.48 – 4.39) | 0.93    |
| <b>Omicron BA.1 SARS-CoV-2 complete spike memory AIM<sup>+</sup>CD4<sup>+</sup> T cells (%CD4<sup>+</sup> T cells)</b>    |                             |                         |                    |         |
| N                                                                                                                         | 15                          | 26                      | 41                 | ..      |
| Mean (SD)                                                                                                                 | 2.71 (1.60)                 | 2.80 (1.88)             | 2.77 (1.76)        | ..      |
| Median (IQR)                                                                                                              | 2.10 (1.64-4.29)            | 2.63 (1.42-3.44)        | 2.35 (1.48-3.51)   | 0.90    |
| <b>Ancestral SARS-CoV-2 complete spike memory AIM<sup>+</sup>CD8<sup>+</sup> T cells (%CD8<sup>+</sup> T cells)</b>       |                             |                         |                    |         |
| N                                                                                                                         | 15                          | 31                      | 46                 | ..      |
| Mean (SD)                                                                                                                 | 0.79 (0.79)                 | 1.67 (1.95)             | 1.39 (1.71)        | ..      |
| Median (IQR)                                                                                                              | 0.49 (0.13-1.42)            | 0.81 (0.22-3.06)        | 0.64 (0.22-1.85)   | 0.24    |
| <b>Ancestral SARS-CoV-2 immunodominant spike memory AIM<sup>+</sup>CD8<sup>+</sup> T cells (%CD8<sup>+</sup> T cells)</b> |                             |                         |                    |         |
| N                                                                                                                         | 15                          | 31                      | 46                 | ..      |
| Mean (SD)                                                                                                                 | 0.17 (0.31)                 | 0.63 (0.44)             | 0.35 (0.56)        | ..      |
| Median (IQR)                                                                                                              | 0.15 (0.05 – 0.64)          | 0.01 (0.00 – 0.21)      | 0.10 (0.01 – 0.52) | 0.055   |
| <b>Omicron BA.1 SARS-CoV-2 complete spike memory AIM<sup>+</sup>CD8<sup>+</sup> T cells (%CD8<sup>+</sup> T cells)</b>    |                             |                         |                    |         |
| N                                                                                                                         | 13                          | 26                      | 39                 | ..      |
| Mean (SD)                                                                                                                 | 0.22 (0.22)                 | 0.28 (0.41)             | 0.26 (0.36)        | ..      |
| Median (IQR)                                                                                                              | 0.15 (0.015-0.44)           | 0.086 (0.013-0.39)      | 0.11 (0.014-0.40)  | 0.78    |

<sup>a</sup>Immunological assessments were performed on blood collected between within three months before the start of the observation period.
